# Supplementary material for: Association Between Clonal Hematopoiesis Driver Mutations, Immune Cell Function, and the Vasculometabolic Complications of Obesity
Source: PubMed Central journal article supplement — J Am Heart Assoc. 2024 Jan 12;13(2):e031665. doi: 10.1161/JAHA.123.031665 (PMC10926828; doi:10.1161/jaha.123.031665), 2024-01-12
Supplement: JAH3-13-e031665-s001.pdf [file JAH3-13-e031665-s001.pdf]

# **Supplemental Material**

**Table S1. Adipose tissue samples real-time PCR primer sequences.**

| Gene           | Forward primer                  | Reverse Primer                 |
|----------------|---------------------------------|--------------------------------|
| Adiponectin    | ATCGGTGAAACCGGAGTACC            | GCATGTTGGGGATAGTAACGTAA        |
| CD68           | GCTGGCTGTGCTTTTCTCG             | GTCACCGTGAAGGATGGCA            |
| CD68(2)        | CTTCTCTCATTCCTATGGACA           | GAAGGACACATTGTACTCCACC         |
| IL-18          | GGCCTCTATTTGAAGATATGACTGATT     | CCTCTAGGCTGGCTATCTTTATACATACT  |
| IL-18bp        | ATGAGACACAACCTGGACACCA          | GCCAGGTCACCTCCAATGC            |
| IL-18R $\beta$ | CCACAGTTACTTGGAGAGGCTTAAA       | GGCATGTGGTAGCGCATT             |
| IL-1 $\alpha$  | ATCATGTAAGCTATGGCCCACT          | CTTCCCGTTGGTTGCTACTAC          |
| IL-1Ra         | GCCTCCGCAGTCACCTAAT             | TCCCAGATTCTGAAGGCTTG           |
| IL-37          | CAGCCTCTGCGGAGAAAGGAAGT         | GTTTCTCCTTCTTCAGCTGAAGGGATGGAT |
| Leptin         | GGTTGCAAGGCCCAAGAA              | ACATAGAAAAGATAGGGCCAAAGC       |
| MCP-1          | CCAGTCACCTGCTGTTATAAC           | TGGAATCCTGAACCCACTTCT          |
| RPL37A         | TAATACGACTCACTATAGGCTTTCTGGGCTC | TCTTCATGCAGGAACCACAG           |
| TNF            | CTCTTCTGCCTGCTGCACTTTG          | ATGGGCTACAGGCTTGTCCTC          |

**Table S2 (see separate Excel file). List of 24 genes sequenced and known clonal hematopoiesis hotspots.**

**Table S3 (see separate Excel file). single-molecule Molecular Inversion Probes (smMIP).**

**Table S4 (see separate Excel file). Variant characteristics of candidate clonal hematopoiesis driver mutations in this study.**

**Table S5. ELISA kits.**

| Description                    | Manufacturer                  | Manufacturer ID | Antibody registry                                |
|--------------------------------|-------------------------------|-----------------|--------------------------------------------------|
| Human IL-1 $\beta$ ELISA kit   | R&D systems                   | DY201           | <a href="#">AB_2848158</a>                       |
| Human IL-6 ELISA kit           | Sanquin                       | M9316           | <a href="#">AB_10851499</a>                      |
| Human TNF- $\alpha$ ELISA kit  | R&D systems                   | DY210           | <a href="#">AB_2848160</a>                       |
| Human IL-22 ELISA kit          | R&D systems                   | DY782           | <a href="#">AB_2928043</a>                       |
| Human IL-17 ELISA kit          | R&D systems                   | DY317           | <a href="#">AB_2928042</a>                       |
| Human IFN $\gamma$ ELISA kit   | Sanquin                       | M9333           | <a href="#">AB_2934300</a>                       |
| Human IL-1Ra ELISA kit         | R&D systems                   | DRA00B          | <a href="#">AB_2916104</a>                       |
| Human Resistin ELISA kit       | R&D systems                   | DY1359          | <a href="#">AB_2893494</a>                       |
| Human Leptin ELISA kit         | R&D systems                   | DY398           | <a href="#">AB_2861156</a>                       |
| Human Adiponectin ELISA kit    | R&D systems                   | DY1065          | <a href="#">AB_2861158</a>                       |
| Human AAT ELISA kit            | R&D systems                   | DY1268          | <a href="#">AB_2934301</a>                       |
| Human IL-1Ra ELISA kit         | R&D systems                   | DY280           | <a href="#">AB_2934302</a>                       |
| Human IL-18BP ELISA kit        | R&D systems                   | DBP180          | <a href="#">AB_2934303</a>                       |
| Human hsCRP ELISA kit (Plasma) | R&D systems                   | DY1707          | <a href="#">AB_2928088</a>                       |
| Human IL-18 ELISA kit          | Simple plex (Biotechne / R&D) | SPCKB-PS-000501 | Multi-analyte cartridges no antibody registry ID |
| Human IL-6 ELISA kit (Plasma)  | Simple plex (Biotechne / R&D) | SPCKB-PS-000190 |                                                  |
| Human VEGF ELISA kit (Plasma)  | Simple plex (Biotechne / R&D) | SPCKB-PS-000330 |                                                  |
| Human IL-1 $\beta$ (plasma)    | Simple plex (Biotechne / R&D) | SPCKB-PS-000216 |                                                  |

**Table S6. Baseline characteristics of men separated according to CHDM status.**

|                               | <b>No CHDM<br/>(n=124)</b> | <b>All CHDM<br/>(n=39)</b> | <b>High VAF (n=15)</b> | <b>Low VAF<br/>(n=24)</b> | <b>Cor. VAF</b> |
|-------------------------------|----------------------------|----------------------------|------------------------|---------------------------|-----------------|
| Age (years)                   | 66 (62-70)                 | 67 (63-71)                 | 72 (67-77)*            | 65 (63-69)                | 0.33            |
| BMI (kg/m <sup>2</sup> )      | 30 (28.2-32)               | 30.3 (28.3-32.2)           | 30 (28.9-30.6)         | 30.8 (28.2-32.8)          | -0.18           |
| Creatinine (μmol/L)           | 87 (80-95)                 | 88 (81-93)                 | 88 (84-93)             | 86 (79-93)                | -0.067          |
| Glucose (mmol/L)              | 5.5 (5.1-6)                | 5.4 (5-5.9)                | 5.4 (5.2-5.6)          | 5.5 (5-6.2)               | -0.16           |
| Total cholesterol<br>(mmol/L) | 5.9 (5.3-6.8)              | 6 (4.8-6.7)                | 5.3 (4.7-6.4)          | 6.1 (4.9-6.8)             | -0.1            |
| Triglycerides<br>(mmol/L)     | 1.7 (1.2-2.2)              | 1.5 (1.3-1.9)              | 1.4 (1.4-1.8)          | 1.5 (1.3-2)               | 0.0081          |
| Heart rate                    | 61 (54-67)                 | 64 (57-72)                 | 61 (52-64)             | 67 (61-75)*               | -0.39           |
| Antihypertensives (%)         | 49                         | 39                         | 47                     | 33                        |                 |
| Lipid lowering drugs<br>(%)   | 33                         | 23                         | 13                     | 29                        |                 |
| Antidiabetic drugs (%)        | 12                         | 5                          |                        | 8                         |                 |

BMI: body mass index. All data are given as median (interquartile ranges 1-3). \*indicates p<0.05 compared to No CHDM group. Correlation is indicated with Spearman correlation coefficient.

**Table S7. Baseline characteristics of women separated according to CHDM status.**

|                               | <b>No CHDM<br/>(n=88)</b> | <b>All CHDM (n=46)</b> | <b>High VAF (n=18)</b> | <b>Low VAF (n=28)</b> | <b>Cor. VAF</b> |
|-------------------------------|---------------------------|------------------------|------------------------|-----------------------|-----------------|
| Age (years)                   | 67 (64-71)                | 68 (63-74)             | 64 (63-71)             | 68 (65-74)            | -0.22           |
| BMI (kg/m <sup>2</sup> )      | 30 (28.6-31.9)            | 29.6 (28.2-31.9)       | 30.4 (28-32.5)         | 29.4 (28.4-31.2)      | 0.1             |
| Creatinine (μmol/L)           | 67 (63-76)                | 70 (63-76)             | 70 (65-72)             | 72 (61-80)            | -0.21           |
| Glucose (mmol/L)              | 5.4 (5-5.9)               | 5.4 (4.9-6)            | 5.4 (5-6.3)            | 5.2 (5-6)             | 0.2             |
| Total cholesterol<br>(mmol/L) | 6.6 (6-7.3)               | 6.4 (5.7-7)            | 6.7 (5.8-6.9)          | 6.4 (5.8-7.2)         | -0.1            |
| Triglycerides (mmol/L)        | 1.6 (1.3-2.1)             | 1.5 (1.3-2.2)          | 1.5 (1.3-2.1)          | 1.5 (1.3-2.3)         | -0.087          |
| Heart rate                    | 62 (57-68)                | 63.5 (59-69)           | 65 (59-72)             | 63 (53-67)            | 0.025           |
| Antihypertensives (%)         | 44                        | 41                     | 56                     | 32                    |                 |
| Lipid lowering drugs<br>(%)   | 21                        | 26                     | 22                     | 29                    |                 |
| Antidiabetic drugs (%)        | 6                         | 9                      | 11                     | 7                     |                 |

BMI: body mass index. All data are given as median (interquartile ranges 1-3). \*indicates p<0.05 compared to No CHDM group. Correlation is indicated with Spearman correlation coefficient.

**Table S8. The association between adipose tissue inflammation and CHDM status of the entire study cohort.**

|                          | No CHDM<br>(n=212)         | All CHDM<br>(n=85)         | High VAF (n=33)            | Low VAF (n=52)             | Cor.<br>VAF |
|--------------------------|----------------------------|----------------------------|----------------------------|----------------------------|-------------|
| no. CLS/fields           | 0.06 (0-0.12)              | 0.06 (0-0.12)              | 0.07 (0-0.1)               | 0.06 (0-0.12)              | 0.06        |
| no.<br>Adipocytes/fields | 20.2 (18.1-22.8)           | 19.7 (17.7-23.9)           | 19.8 (18.1-23)             | 19.7 (17.3-25.6)           | 0.11        |
| no. CD68/fields          | 2.3 (1.6-3.2)              | 2.2 (1.7-3.3)              | 2.1 (1.8-3.2)              | 2.2 (1.6-3.3)              | 0.096       |
| % CD68                   | 11.2 (8.2-15.8)            | 11.5 (8.9-15.8)            | 11 (9.3-14.7)              | 11.5 (8-16.3)              | 0.071       |
| Area (Median)            | 2250.21 (1844.29-<br>2718) | 2234 (1853.3-<br>2696.5)   | 2224.5 (1929.7-<br>2601.1) | 2238.5 (1829.7-<br>2776)   | 0.035       |
| Feretmin (Median)        | 47.2 (42.1-52.5)           | 47.1 (43.2-51.4)           | 47.4 (43.5-51.2)           | 47.1 (42.3-51.6)           | 0.042       |
| Area (Mean)              | 3199.1 (2729-<br>3779.4)   | 3282.1 (2761.9-<br>3698.2) | 3257.1 (2853.4-<br>3576.5) | 3285.5 (2738.8-<br>3858.3) | -0.0013     |
| SQ leptin                | 0.06 (0.04-0.1)            | 0.07 (0.05-0.1)            | 0.07 (0.05-0.1)            | 0.07 (0.05-0.2)            | 0.057       |
| SQ IL-18R $\beta$        | 0.06 (0.02-0.2)            | 0.07 (0.03-0.2)            | 0.04 (0.03-0.2)            | 0.1 (0.03-0.3)             | -0.014      |
| SQ IL-1 $\alpha$         | 0.05 (0.01-0.14)           | 0.07 (0.02-0.2)            | 0.04 (0.02-0.1)            | 0.1 (0.03-0.3)             | -0.01       |
| SQ MCP1                  | 0.06 (0.04-0.09)           | 0.06 (0.04-0.1)            | 0.05 (0.04-0.07)           | 0.07 (0.04-0.1)            | -0.14       |
| SQ IL-37                 | 0.04 (0.009-0.1)           | 0.05 (0.02-0.2)            | 0.03 (0.02-0.09)           | 0.09 (0.01-0.24)           | -0.014      |
| SQ CD68                  | 0.07 (0.03-0.14)           | 0.08 (0.03-0.18)           | 0.05 (0.03-0.1)            | 0.11 (0.05-0.23)*          | -0.11       |
| SQ CD68(2)               | 0.05 (0.02-0.17)           | 0.07 (0.02-0.23)           | 0.04 (0.02-0.1)            | 0.11 (0.03-0.27)           | -0.051      |
| SQ Adiponectin           | 0.08 (0.04-0.14)           | 0.09 (0.04-0.18)           | 0.06 (0.04-0.12)           | 0.1 (0.06-0.22)*           | -0.16       |
| SQ TNF                   | 0.04 (0.01-0.15)           | 0.05 (0.02-0.18)           | 0.03 (0.02-0.11)           | 0.1 (0.02-0.25)*           | -0.026      |
| SQ IL-18                 | 0.19 (0.099-0.37)          | 0.16 (0.096-0.27)          | 0.16 (0.1-0.24)            | 0.18 (0.09-0.29)           | 0.07        |
| SQ IL-18Bp               | 0.03 (0.005-0.36)          | 0.04 (0.01-0.54)           | 0.09 (0.01-0.89)           | 0.04 (0.01-0.33)           | 0.04        |
| SQ IL-1RA                | 0.04 (0.02-0.11)           | 0.04 (0.01-0.09)           | 0.03 (0.02-0.07)           | 0.04 (0.01-0.18)           | -0.038      |

CLS: Crown-like structure, SQ: starting quantity, CD68 gene expression measured with 2 primers

All data are given as median (interquartile ranges 1-3). \*indicates  $p < 0.05$  compared to No CHDM group. Correlation is indicated with Spearman correlation coefficient.

**Table S9. Leukocyte numbers and differentiation, and thrombocyte numbers according to CHDM status of men.**

|                                 | <b>No CHDM<br/>(n=124)</b> | <b>All CHDM<br/>(n=39)</b> | <b>High VAF<br/>(n=15)</b> | <b>Low VAF<br/>(n=24)</b> | <b>Cor. VAF</b> |
|---------------------------------|----------------------------|----------------------------|----------------------------|---------------------------|-----------------|
| Leukocytes 10 <sup>9</sup> /l   | 6 (5-6.7)                  | 6.3 (5.7-7.4)*             | 6.4 (5.9-7.5)              | 6.2 (5.6-7.4)             | 0.18            |
| Neutrophils 10 <sup>9</sup> /l  | 3.2 (2.7-3.8)              | 3.6 (2.9-4.8)*             | 4 (3.4-4.7)*               | 3.4 (2.7-4.7)             | 0.2             |
| Lymphocytes 10 <sup>9</sup> /l  | 1.8 (1.5-2.2)              | 1.8 (1.6-2.1)              | 1.7 (1.4-2)                | 1.9 (1.6-2.3)             | 0.013           |
| Monocytes 10 <sup>9</sup> /l    | 0.5 (0.4-0.6)              | 0.6 (0.5-0.7)              | 0.6 (0.5-0.7)              | 0.5 (0.5-0.7)             | 0.028           |
| Eosinophils 10 <sup>9</sup> /l  | 0.2 (0.1-0.2)              | 0.2 (0.1-0.3)              | 0.1 (0.1-0.3)              | 0.2 (0.1-0.3)             | -0.02           |
| Basophils 10 <sup>9</sup> /l    | 0.03<br>(0.02-0.04)        | 0.03<br>(0.03-0.05)*       | 0.03<br>(0.03-0.05)*       | 0.03<br>(0.02-0.04)       | 0.07            |
| Thrombocytes 10 <sup>9</sup> /l | 217 (188-244)              | 208 (193-254)              | 215 (199-272)              | 206 (190-246)             | 0.31            |
| NLR                             | 1.8 (1.4-2.3)              | 2 (1.6-2.5)                | 2.3 (1.9-2.7)*             | 1.8 (1.2-2.4)             | 0.18            |

NLR: Neutrophil to lymphocyte ratio

All data are given as median (interquartile ranges 1-3). \*indicates p<0.05 compared to No CHDM group. Correlation is indicated with Spearman correlation coefficient.



**Table S10. Leukocyte numbers and differentiation, and thrombocyte numbers according to CHDM status of women.**

|                                 | <b>No CHDM<br/>(n=88)</b> | <b>All CHDM<br/>(n=46)</b> | <b>High VAF<br/>(n=18)</b> | <b>Low VAF<br/>(n=28)</b> | <b>Cor. VAF</b> |
|---------------------------------|---------------------------|----------------------------|----------------------------|---------------------------|-----------------|
| Leukocytes 10 <sup>9</sup> /l   | 5.5 (5-6.3)               | 5.9 (5-7.2)                | 6.2 (5-7.3)                | 5.8 (5.1-6.9)             | 0.18            |
| Neutrophils 10 <sup>9</sup> /l  | 3.1 (2.6-3.6)             | 3.2 (2.6-3.9)              | 3.2 (2.5-3.9)              | 3.1 (2.7-3.9)             | 0.14            |
| Lymphocytes 10 <sup>9</sup> /l  | 1.9 (1.5-2.3)             | 2 (1.6-2.3)                | 2.1 (1.7-2.3)              | 1.9 (1.5-2.3)             | 0.2             |
| Monocytes 10 <sup>9</sup> /l    | 0.4 (0.4-0.5)             | 0.5 (0.4-0.6)              | 0.5 (0.4-0.6)              | 0.4 (0.4-0.5)             | 0.27            |
| Eosinophils 10 <sup>9</sup> /l  | 0.1 (0.1-0.2)             | 0.2 (0.1-0.3)              | 0.2 (0.1-0.3)              | 0.2 (0.1-0.2)             | 0.035           |
| Basophils 10 <sup>9</sup> /l    | 0.03 (0.02-0.04)          | 0.03 (0.02-0.04)           | 0.03 (0.02-0.04)           | 0.03 (0.02-0.04)          | -0.046          |
| Thrombocytes 10 <sup>9</sup> /l | 247 (216-283)             | 247 (215-275)              | 247 (205-280)              | 248 (226-272)             | -0.024          |
| NLR                             | 1.5 (1.3-2)               | 1.7 (1.3-2)                | 1.5 (1.3-1.8)              | 1.8 (1.4-2)               | -0.13           |

NLR: Neutrophil to lymphocyte ratio

All data are given as median (interquartile ranges 1-3). \*indicates p<0.05 compared to No CHDM group. Correlation is indicated with Spearman correlation coefficient.

**Table S11. *Ex vivo* cytokine production capacity of PBMCs separated according to CHDM status of men.**

|                      | <b>No CHDM<br/>(n=124)</b> | <b>All CHDM (n=39)</b> | <b>High VAF (n=15)</b> | <b>Low VAF (n=24)</b> | <b>Cor.<br/>VAF</b> |
|----------------------|----------------------------|------------------------|------------------------|-----------------------|---------------------|
| LPS(10 ng/ml)        | 1029.7                     | 1116.9                 | 1258.9                 | 1099.07 (597.29-      |                     |
| IL-1 $\beta$         | (543.3-1732)               | (589-1657.3)           | (602.1-1637.)          | 1630.78)              | -0.0086             |
| LPS(100 ng/ml)       | 2351.1                     | 2809.6                 | 2894.8                 | 2491.5                |                     |
| IL-1 $\beta$         | (1475.1-3770)              | (1554.1-4038.1)        | (2320.3-4038.1)        | (1466.8-4080.9)       | -0.024              |
|                      | 280.3                      | 291                    | 287                    | 315                   |                     |
| Pam3Cys IL-1 $\beta$ | (112.6-630.6)              | (113.9-597.3)          | (79-647)               | (135.1-475.9)         | 0.023               |
| LPS(10 ng/ml)        | 5367.8                     | 5441.3                 | 5342.8                 | 6014.2                |                     |
| IL-6                 | (2940-8598.88)             | (4307.7-7309.4)        | (4307.65-6801.7)       | (4204.9-7363)         | -0.18               |
| LPS(100 ng/ml)       | 8103.6                     | 8383.8                 | 7827.2                 | 8455.7                |                     |
| IL-6                 | (4800.8-12236.7)           | (5730.1-12896.95)      | (5580.3-13232.5)       | (6762-12011.8)        | -0.14               |
|                      | 3750.2                     | 3654.1                 | 3381.5                 | 3744.9                |                     |
| Pam3Cys IL-6         | (1590.5-6675.8)            | (1602.85-5778.6)       | (1100.6-6721.7)        | (1998.4-5465.7)       | -0.13               |

LPS: Lipopolysaccharide, IL: interleukin, IL-1 $\beta$  and IL-6 concentration units are given in pg/ml

All data are given as median (interquartile ranges 1-3). \*indicates  $p < 0.05$  compared to No CHDM group. Correlation is indicated with Spearman correlation coefficient.

**Table S12. *Ex vivo* cytokine production capacity of PBMCs separated according to CHDM status of women.**

|                      | No CHDM (n=88)   | All CHDM (n=46)   | High VAF (n=18)  | Low VAF (n=28)    | Cor. VAF |
|----------------------|------------------|-------------------|------------------|-------------------|----------|
| LPS(10 ng/ml)        | 1194.1           | 832.2             | 957.3            | 790.1             |          |
| IL-1 $\beta$         | (677.5-2056.9)   | (515.1-1682.4)    | (450.4-2448.2)   | (533.9-1306.8)    | 0.12     |
| LPS(100 ng/ml)       | 2548.5           | 1823.3            | 2054.4           | 1724.3            |          |
| IL-1 $\beta$         | (1575.3-3638.6)  | (1103.3-2950.5) * | (992.7-3010.1)   | (1231.2-2833.3)   | 0.11     |
|                      | 291.4            | 127.04            | 135.4            | 104.3             |          |
| Pam3Cys IL-1 $\beta$ | (110.6-671.6)    | (64.9-309.92) *   | (55.9-397.1)     | (67.9-277.2)*     | 0.093    |
| LPS(10 ng/ml)        | 6107.8           | 4407.8            | 4407.8           | 4627              |          |
| IL-6                 | (3837.8-9388.1)  | (2468-5910.9)*    | (2616.3-6051.7)* | (2444.8-5766.8)*  | 0.098    |
| LPS(100 ng/ml)       | 8344.9           | 6349.7            | 5121.7           | 6921.65           |          |
| IL-6                 | (5445.7-13132.3) | (3609.9-8306.8)   | (3502-7412)*     | (4114.38-10786.5) | 0.041    |
|                      | 4185.7           | 1569.8            | 1670.3           | 1569.7            |          |
| Pam3Cys IL-6         | (2125.9-6202.9)  | (811.1-2579.2)*   | (684.9-3184.6)*  | (828-2256.4)*     | 0.25     |

LPS: Lipopolysaccharide, IL: interleukin, IL-1 $\beta$  and IL-6 concentration units are given in pg/ml

All data are given as median (interquartile ranges 1-3). \*indicates p<0.05 compared to No CHDM group. Correlation is indicated with Spearman correlation coefficient

**Table S13. Circulating cytokines and adipokines in plasma separated according to CHDM status of men.**

|                           | <b>No CHDM<br/>(n=124)</b> | <b>All CHDM (n=39)</b> | <b>High VAF (n=24)</b> | <b>Low VAF (n=15)</b> | <b>Cor. VAF</b> |
|---------------------------|----------------------------|------------------------|------------------------|-----------------------|-----------------|
| IL-6 (pg/ml)              | 2.3 (1.6-3.3)              | 2.8 (1.8-4.6)          | 2.9 (2.1-4.6)          | 2.7 (1.7-4)           | 0.052           |
| IL-1 $\beta$ (pg/ml)      | 0.06 (0.06-0.1)            | 0.06 (0.06-0.11)       | 0.06 (0.06-0.01)       | 0.08 (0.06-0.11)      | -0.1            |
| IL-18 (pg/ml)             | 313 (222.7-515)            | 300.9 (224.5-510.2)    | 277.7 (224.5-349.2)    | 341 (232.5-628.4)     | -0.17           |
| IL-18bpa (ng/ml)          | 17.1 (14.4-20)             | 16.4 (13.6-20.2)       | 16.5 (13-17.7)         | 16.2 (14.1-21.2)      | -0.2            |
| hsCRP ( $\mu$ g/ml)       | 1.4 (0.9-3)                | 1.9 (1.1-3.1)          | 1.9 (1-3.7)            | 1.9 (1.3-2.8)         | 0.033           |
| AAT (mg/ml)               | 1 (0.6-1.7)                | 0.9 (0.6-1.4)          | 0.9 (0.7-1.1)          | 0.87 (0.61-1.44)      | 0.12            |
| Resistin (ng/ml)          | 10.3 (8-12.8)              | 11.5 (9.3-15.2)        | 11.8 (10-14.9)         | 11.3 (9.2-15.9)       | -0.0066         |
| Leptin (ng/ml)            | 10.2 (7-15)                | 12.3 (7.5-17)          | 8.5 (6.9-16.1)         | 13.3 (8.4-21.3)       | -0.22           |
| Adiponectin ( $\mu$ g/ml) | 3.1 (2.2-4.5)              | 3.3 (2.7-4.3)          | 3.7 (3-4.2)            | 3.1 (2.3-4.4)         | 0.092           |

IL: interleukin, IL-18bp: IL-18 binding protein, CRP: C-reactive protein, AAT: Alpha-1 antitrypsin

All data are given as median (interquartile ranges 1-3). \*indicates  $p < 0.05$  compared to No CHDM group.

Correlation is indicated with Spearman correlation coefficient.

**Table S14. Circulating cytokines and adipokines in plasma separated according to CHDM status of women.**

|                           | No CHDM (n=88)      | All CHDM (n=46)     | High VAF (n=18)     | Low VAF (n=28)   | Cor. VAF |
|---------------------------|---------------------|---------------------|---------------------|------------------|----------|
| IL-6 (pg/ml)              | 2.7 (1.9-3.4)       | 2.6 (1.7-4.1)       | 3.3 (2-4.4)         | 2.2 (1.5-3)      | 0.36     |
| IL-1 $\beta$ (pg/ml)      | 0.06 (0.06-0.11)    | 0.06 (0.06-0.13)    | 0.06 (0.06-0.14)    | 0.07 (0.06-0.11) | 0.013    |
| IL-18 (pg/ml)             | 300.1 (234.1-478.8) | 283.7 (204.2-469.9) | 411.3 (222.3-489.9) | 252.5 (200-379)  | 0.27     |
| IL-18bpa (ng/ml)          | 17.5 (14-21.4)      | 15.8 (13.5-19)      | 14.9 (12.8-18.7)    | 16.2 (14.2-19.2) | -0.098   |
| hsCRP ( $\mu$ g/ml)       | 2.7 (1.1-4.6)       | 2.1 (1.3-3.7)       | 2 (0.9-3.7)         | 2.2 (1.5-3.8)    | 0.13     |
| AAT (mg/ml)               | 0.9 (0.6-1.9)       | 0.9 (0.6-1.3)       | 0.8 (0.6-1.6)       | 0.9 (0.6-1.1)    | -0.037   |
| Resistin (ng/ml)          | 10.8 (8.6-15.3)     | 11.5 (9-14.4)       | 11.4 (8.3-13)       | 12.8 (10-16.2)   | -0.18    |
| Leptin (ng/ml)            | 31.5 (21.7-48.1)    | 27.5 (17.8-51)      | 25.4 (18.8-47.1)    | 28.8 (17.5-52.7) | -0.056   |
| Adiponectin ( $\mu$ g/ml) | 6 (4.6-7.3)         | 5.1 (4.2-8)         | 4.9 (4.2-6.8)       | 6 (4.2-8)        | -0.046   |

IL: interleukin, IL-18bp: IL-18 binding protein, CRP: C-reactive protein, AAT: Alpha-1 antitrypsin

All data are given as median (interquartile ranges 1-3). \*indicates  $p < 0.05$  compared to No CHDM group. Correlation is indicated with Spearman correlation coefficient.

**Table S15. The association between targeted proteomic biomarkers and CHDM status of the entire study cohort.**

|           | <b>No CHDM<br/>(n=212)</b> | <b>All CHDM (n=85)</b> | <b>High VAF<br/>(n=33)</b> | <b>Low VAF (n=52)</b> | <b>Cor. VAF</b> |
|-----------|----------------------------|------------------------|----------------------------|-----------------------|-----------------|
| SLAMF7    | 3.6 (3.3-4.1)              | 3.5 (3.2-3.9)          | 3.6 (3.3-4)                | 3.4 (3-3.7)*          | 0.22            |
| IL1RL2    | 4.5 (4.3-4.8)              | 4.6 (4.4-4.9)*         | 4.6 (4.3-4.8)              | 4.6 (4.4-4.9)         | 0.15            |
| IL-27     | 6.5 (6.3-6.7)              | 6.4 (6.1-6.7)*         | 6.3 (6.1-6.7)              | 6.4 (6.1-6.6)         | 0.021           |
| GH        | 8 (6.5-9.4)                | 7.3 (6.3-9.3)          | 7.9 (6.3-9.9)              | 7.2 (6.2-8.7)*        | 0.23            |
| GLO1      | 5.6 (5.4-5.9)              | 5.5 (5.1-5.8)          | 5.4 (5.1-5.8)*             | 5.6 (5.2-5.9)         | -0.21           |
| AMBP      | 7.9 (7.9-8)                | 8 (7.8-8.1)            | 7.9 (7.8-8)                | 8 (7.9-8.1)*          | -0.073          |
| CCL3      | 6.7 (6.3-7)                | 6.7 (6.1-7)            | 6.4 (6.1-6.7)*             | 6.7 (6.4-7.1)         | -0.26           |
| TNFRSF13B | 10 (9.8-10.3)              | 9.9 (9.7-10.1)*        | 10 (9.8-10.2)              | 9.9 (9.7-10.1)*       | 0.042           |
| LEP       | 6.8 (6.2-7.4)              | 7.1 (6.5-7.5)*         | 7.1 (6.4-7.4)              | 7.2 (6.5-7.6)*        | 0.012           |
| NEMO      | 5.8 (5.2-6.4)              | 5.7 (5-6.2)            | 5.5 (5-5.8)*               | 5.9 (5-6.4)           | -0.21           |
| VEGFD     | 8.1 (7.9-8.3)              | 8 (7.8-8.2)            | 8.1 (7.9-8.4)              | 8 (7.8-8.1)*          | 0.33            |
| AXIN1     | 2.7 (2.3-3.2)              | 2.6 (2-3.2)            | 2.3 (2-3)*                 | 2.7 (2.1-3.5)         | -0.16           |
| TSLP      | 0.6 (0.4-0.8)              | 0.6 (0.4-0.8)          | 0.5 (0.3-0.7)*             | 0.6 (0.4-0.8)         | -0.14           |
| MMP-1     | 9.7 (9-10.4)               | 9.6 (9-10.2)           | 9.4 (8.9-9.7)*             | 9.8 (9.2-10.5)        | -0.23           |
| CCL3.1    | 5.1 (4.9-5.5)              | 5.1 (4.8-5.4)          | 4.9 (4.8-5.2)*             | 5.2 (4.8-5.7)         | -0.22           |
| FGF-19    | 8.3 (7.7-8.9)              | 8 (7.4-8.5)*           | 8.1 (7.5-8.6)              | 7.9 (7.3-8.5)*        | 0.081           |
| ST1A1     | 2.9 (2.3-3.5)              | 2.8 (2.1-3.4)          | 2.4 (2-3.1)*               | 2.9 (2.1-3.5)         | -0.17           |

All data are given as median (interquartile ranges 1-3). \*indicates  $p < 0.05$  compared to No CHDM group.

Correlation is indicated with Spearman correlation coefficient.

**Figure S1. Volcano plots depicting increase and decrease in NPX (normalized protein expression) values of OLINK biomarkers measured in plasma with targeted proteomics.**

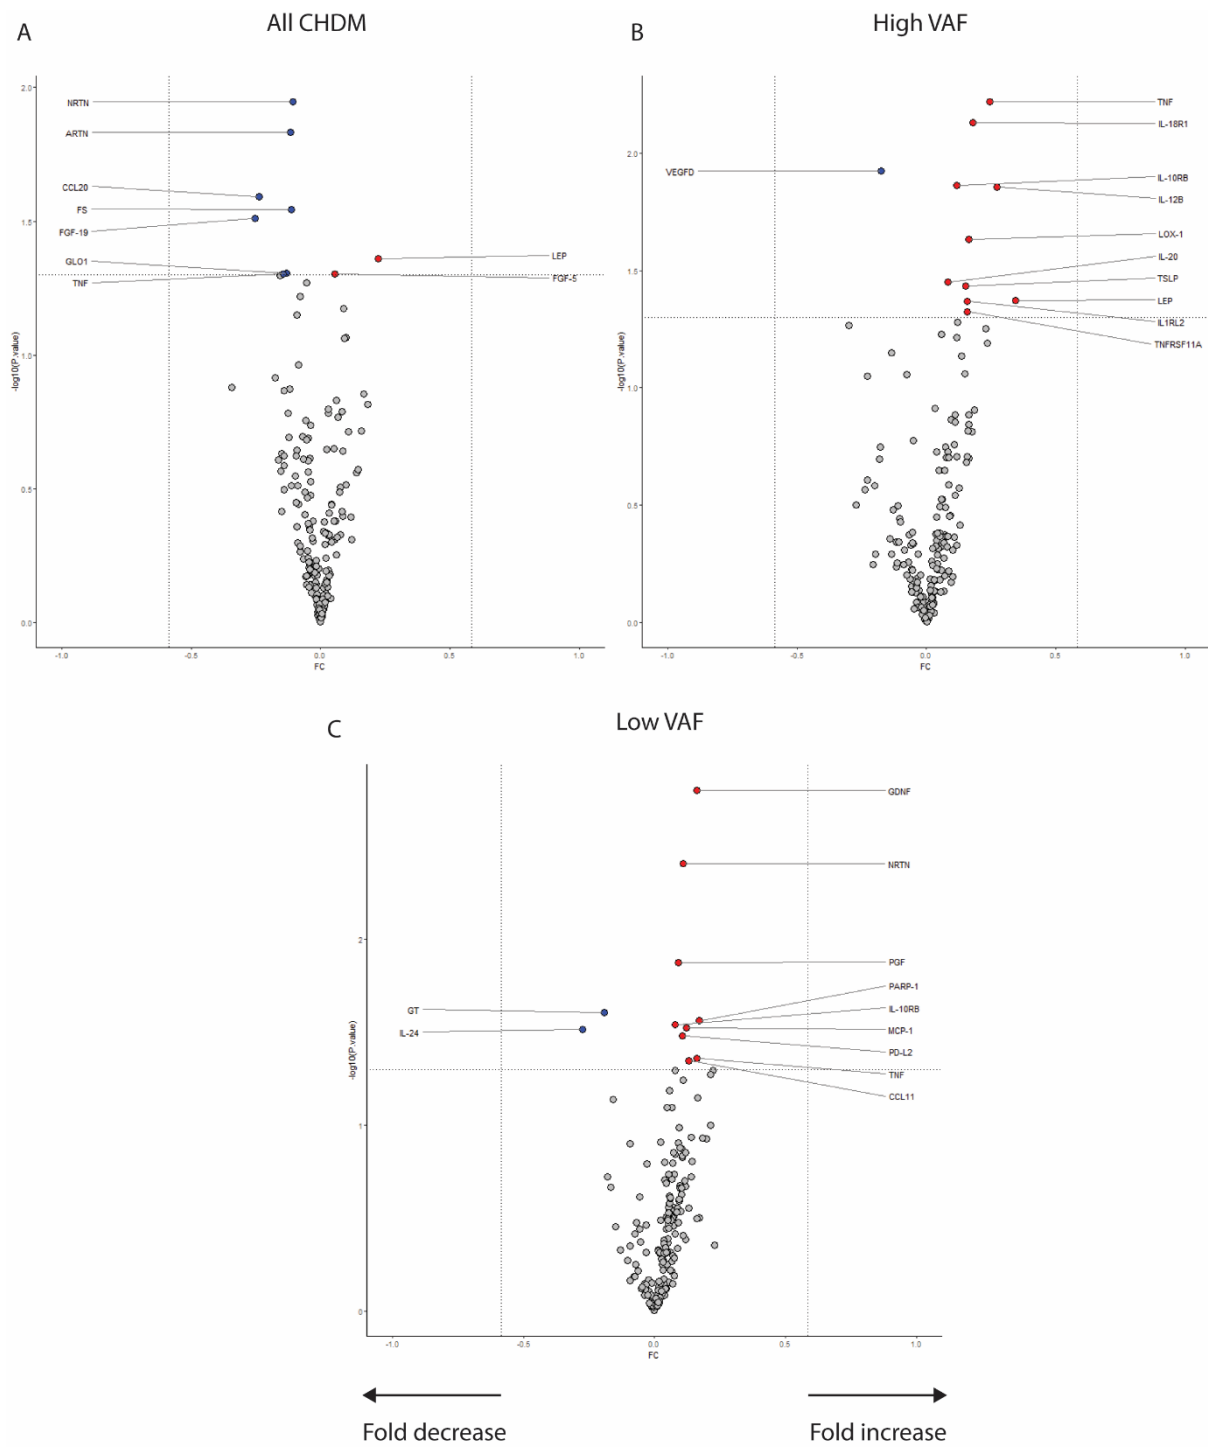

Differential expression of A) All CHDM, B) High VAF (VAF $\geq$ 2%) C) Low VAF (VAF<2%) groups compared to No CHDM group.
